# Supplementary material for: Epidemiology of allergic rhinitis and associated risk factors in Asia
Source: PubMed Central journal article supplement (PMC6091170; doi:10.1186/s40413-018-0198-z), 2018-08-06
Supplement: 40413_2018_198_MOESM1_ESM.pdf [file 40413_2018_198_MOESM1_ESM.pdf]

## Additional file

Additional file 1: List of countries and dependent territories used in the literature review search

| No. | Country (or dependent territory)                                                                 | No. | Country (or dependent territory)                                                                         | No. | Country (or dependent territory)                                                                    |
|-----|--------------------------------------------------------------------------------------------------|-----|----------------------------------------------------------------------------------------------------------|-----|-----------------------------------------------------------------------------------------------------|
| 1   |  China          | 18  |  Malaysia               | 35  |  Kyrgyzstan      |
| 2   |  India          | 19  |  Nepal                  | 36  |  Singapore       |
| 3   |  Indonesia      | 20  |  Afghanistan            | 37  |  Turkmenistan    |
| 4   |  Pakistan       | 21  |  Yemen                  | 38  |  Palestine       |
| 5   |  Bangladesh     | 22  |  North Korea            | 39  |  Lebanon         |
| 6   |  Russia         | 23  |  Taiwan <sup>[6]</sup>  | 40  |  Oman            |
| 7   |  Japan        | 24  |  Sri Lanka            | 41  |  Kuwait        |
| 8   |  Philippines  | 25  |  Syria                | 42  |  Georgia       |
| 9   |  Vietnam      | 26  |  Kazakhstan           | 43  |  Mongolia      |
| 10  |  Iran         | 27  |  Cambodia             | 44  |  Armenia       |
| 11  |  Turkey       | 28  |  Azerbaijan           | 45  |  Qatar         |
| 12  |  Thailand     | 29  |  United Arab Emirates | 46  |  Bahrain       |
| 13  |  Myanmar      | 30  |  Tajikistan           | 47  |  Timor-Leste   |
| 14  |  South Korea  | 31  |  Israel               | 48  |  Bhutan        |
| 15  |  Iraq         | 32  |  Hong Kong (China)    | 49  |  Macau (China) |
| 16  |  Saudi Arabia | 33  |  Jordan               | 50  |  Brunei        |
| 17  |  Uzbekistan   | 34  |  Laos                 | 51  |  Maldives      |
